# Supplementary material for: Community science designed ribosomes with beneficial phenotypes
Source: bioRxiv or medRxiv preprint supplement (doi:10.1101/2021.09.05.458952), 2021-09-12
Supplement: Supplementary file [file media-1.pdf]

## Supplemental Data

### Community science designed ribosomes with beneficial phenotypes

Antje Krüger<sup>1,\*</sup>, Andrew M. Watkins<sup>2,\*</sup>, Roger Wellington-Oguri<sup>3</sup>, Jonathan Romano<sup>2,3,4</sup>, Camila Kofman<sup>1</sup>, Alysse DeFoe<sup>1</sup>, Yejun Kim<sup>1</sup>, Jeff Anderson-Lee<sup>3</sup>, Eli Fisker<sup>3</sup>, Jill Townley<sup>3</sup>, Eterna participants<sup>3</sup>, Anne E. d'Aquino<sup>1</sup>, Rhiju Das<sup>2,5,#</sup>, Michael C. Jewett<sup>1,6,#</sup>

<sup>1</sup>Department of Chemical and Biological Engineering, Chemistry of Life Processes Institute, and Center for Synthetic Biology, Northwestern University, Evanston, IL 60208, USA

<sup>2</sup>Department of Biochemistry, Stanford University, Stanford, CA 94305, USA

<sup>3</sup>Eterna Massive Open Laboratory, Stanford, CA 94305, USA

<sup>4</sup>Department of Computer Science and Engineering, State University of New York at Buffalo, Buffalo, NY 14260

<sup>5</sup>Department of Physics, Stanford University, Stanford, CA 94305, USA

<sup>6</sup>Robert H. Lurie Comprehensive Cancer Center and Simpson Querrey Institute, Northwestern University, Chicago, IL 60611, USA

\*These authors contributed equally

### Contents

1. Supplemental details on ribosome puzzle definitions
2. Plasmid sequences
3. Supplemental Figures

In addition to the following supplemental details, sequences, and figures, please find a Suppl. Table (Excel spreadsheet) containing all designed rRNAs' parameters and experimental data as well as diagrams of each of the rRNAs designed in this study supplied as a single .zip archive.

## 1. Supplemental details on ribosome puzzle definitions

### *Energetic rationale for base locks*

Most base locks were chosen based on intra- or inter-subunit tertiary contacts, particularly when Watson-Crick, and protein-RNA contacts that would both enormously influence the folding energetics of the rRNA under investigation but could not be represented in a secondary structure folding model. Pseudoknotted residues were also locked; folding the ribosome with a pseudoknot-aware secondary structure model would be both physically unrealistic (ribosome folding is chaperoned; the only pseudoknots likely to form in designed ribosomes are those that form in the wild type) and computationally intractable.

Some “singlet” base pairs, however, were also locked. In large, folded RNAs, tertiary folding influences the secondary structure ensemble and can render stable features that otherwise might struggle to form. “Singlet” base pairs – those that do not form part of a secondary structure stem – are not favorable on their own, since they contribute no stabilizing stacking energy, and in energy models like Vienna will typically destabilize large loops.

Because this “secondary structure” constraint could not be satisfied in the energy model, we omitted it from the target secondary structure to make the objective more achievable for players, but we locked the nucleotides to ensure that these destabilized bases were not mutated.

## 2. Plasmid sequences

pL-rrnB-wild type:

```
GATCTCTCACCTACCAAACAATGCCCCCTGCAAAAAATAAATTCATATAAAAAACATACAG
ATAACCATCTGCGGTGATAAATTATCTCTGGCGGTGTTGACATAAATACCACTGGCGGTTAT
ACTGAGCACGGGTACCGGCCGCTGAGAAAAGCGAAGCGGCACTGCTCTTTAACAAATTTA
TCAGACAATCTGTGTGGGCACTCGAAGATACGGATTCTTAACGTCGCAAGACGAAAAATGA
ATACCAAGTCTCAAGAGTGAACACGTAATTCATTACGAAGTTTAATTCTTTGAGCGTCAAAC
TTTTAAATTGAAGAGTTTGATCATGGCTCAGATTGAACGCTGGCGGCAGGCCTAACACATG
CAAGTCGAACGGTAACAGGAAGAAGCTTGCTTCTTTGCTGACGAGTGGCGGACGGGTGAG
TAATGTCTGGGAAACTGCCTGATGGAGGGGGATAACTACTGGAACGGTAGCTAATACCG
CATAACGTCGCAAGACCAAGAGGGGGACCTTCGGGCCTCTTGCCATCGGATGTGCCAG
ATGGGATTAGCTAGTAGGTGGGGTAACGGCTCACCTAGGCGACGATCCCTAGCTGGTCTG
AGAGGATGACCAGCCACACTGGAAGTGAACACGGTCCAGACTCCTACGGGAGGCAGCA
GTGGGGAATATTGCACAATGGGCGCAAGCCTGATGCAGCCATGCCGCGTGTATGAAGAAG
GCCTTCGGGTTGTAAAGTACTTTCAGCGGGGAGGAAGGGAGTAAAGTTAATACCTTTGCTC
ATTGACGTTACCCGCAGAAGAAGCACCGGCTAACTCCGTGCCAGCAGCCGCGGTAATACG
GAGGGTGCAAGCGTTAATCGGAATTAAGTGGCGTAAAGCGCACGCAGGCGGTTTGTAAAG
TCAGATGTGAAATCCCCGGGCTCAACCTGGGAACTGCATCTGATACTGGCAAGCTTGAGT
CTCGTAGAGGGGGTAGAATTCAGGTGTAGCGGTGAAATGCGTAGAGATCTGGAGGAAT
ACCGGTGGCGAAGGCGGCCCCCTGGACGAAGACTGACGCTCAGGTGCGAAAGCGTGGG
GAGCAAACAGGATTAGATACCCTGGTAGTCCACGCCGTAACGATGTCGACTTGGAGGTT
GTGCCCTTGAGGCGTGGCTTCCGGAGCTAACGCGTTAAGTCGACCGCCTGGGGAGTACG
GCCGCAAGGTTAAACTCAAATGAATTGACGGGGGCCCGCACAAAGCGGTGGAGCATGTG
GTTTAATTCGATGCAACGCGAAGAACCTTACCTGGTCTTGACATCCACGGAAGTTTTTCAGA
GATGAGAATGTGCCTTCGGGAACCGTGAGACAGGTGCTGCATGGCTGTCGTCAGCTCGTG
TTGTGAAATGTTGGGTTAAGTCCCGCAACGAGCGCAACCCTTATCCTTTGTTGCCAGCGGT
CCGGCCGGGAACTCAAAGGAGACTGCCAGTGATAAACTGGAGGAAGGTGGGGATGACGT
```

CAAGTCATCATGGCCCTTACGACCAGGGCTACACACGTGCTACAATGGCGCATACAAAGA  
GAAGCGACCTCGCGAGAGCAAGCGGACCTCATAAAGTGCCTCGTAGTCCGGATTGGAGTC  
TGCAACTCGACTCCATGAAGTCGGAATCGCTAGTAATCGTGGATCAGAATGCCACGGTGAA  
TACGTTCCCGGGCCTTGTACACACCGCCCGTACACCATGGGAGTGGGTTGCAAAAGAAG  
TAGGTAGCTTAACCTTCGGGAGGGCGCTTACCACTTTGTGATTCATGACTGGGGTGAAGTC  
GTAACAAGGTAACCGTAGGGGAACCTGCGGTTGGATCACCTCCTTACCTTAAGAAGCGTA  
CTTTGTAGTGCTCACACAGATTGTCTGATAGAAAGTGAAAAGCAAGGCGTTTACGCGTTGG  
GAGTGAGGCTGAAGAGAATAAGGCCGTTTCGCTTTCTATTAATGAAAGCTCACCTACACGA  
AAATATCACGCAACGCGTGATAAGCAATTTTCGTGTCCCCTTCGTCTAGAGGCCCAGGACA  
CCGCCCTTTCACGGCGGTAACAGGGGTTCAATCCCCTAGGGGACGCCACTTGCTGGTTT  
GTGAGTGAAAAGTCGCCGACCTTAATATCTCAAACTCATCTTCGGGTGATGTTTGAGATATT  
TGCTCTTTAAAATCTGGATCAAGCTGAAAATTGAAACACTGAACAACGAGAGTTGTTCTGTG  
AGTCTCTCAAATTTTCGCAACACGATGATGAATCGAAAGAAACATCTTCGGGTTGTGAGGTT  
AAGCGACTAAGCGTACACGGTGGATGCCCTGGCAGTCAGAGGCGATGAAGGACGTGCTA  
ATCTGCGATAAGCGTTCGGTAAGGTGATATGAACCGTTATAACCGGCCGATTTCCGAATGGG  
GAAACCCAGTGTGTTTCGACACACTATCATAACTGAATCCATAGGTTAATGAGGCGAACCC  
GGGGAACTGAAACATCTAAGTACCCCGAGGAAAAGAAATCAACCGAGATTTCCCCAGTA  
GCGGCGAGCGAACGGGGAGCAGCCAGAGCCTGAATCAGTGTGTGTGTTAGTGAAGCG  
TCTGGAAAGGCGCGGATACAGGGTGACAGCCCCGTACACAAAATGCACATGCTGTGAG  
CTCGATGAGTAGGGCGGGACACGTGGTATCCTGTCTGAATATGGGGGGACCATCCTCCAA  
GGCTAAATACTCCTGACTGACCGATAGTGAACAGTACCGTGAGGGAAAGGCGAAAAGAA  
CCCCGGCGAGGGGAGTGAAAAGAACCTGAAACCGTGTACGTACAAGCAGTGGGAGCAC  
GCTTAGGCGTGTGACTGCGTACCTTTTGTATAATGGGTCAGCGACTTATATTCTGTAGCAA  
GGTTAACCGAATAGGGGAGCCGAAGGGAAACCGAGTCTTAAGTGGGCGTTAAGTTGCAGG  
GTATAGACCCGAAACCCGGTGTATCTAGCCATGGGCAGGTTGAAGGTTGGGTAACACTAAC  
TGAGGACCCGAACCGACTAATGTTGAAAATTAGCGGATGACTTGTGGCTGGGGGTGAAA  
GGCCAATCAAACCGGGAGATAGCTGGTTCTCCCCGAAAGCTATTTAGGTAGCGCCTCGTG  
AATTCATCTCCGGGGGTAGAGCACTGTTTCGGCAAGGGGGTTCATCCCGACTTACCAACCC  
GATGCAAACCTGCGAATACCGGAGAATGTTATCACGGGAGACACACGGCGGGTGCTAACGT  
CCGTCTGTGAAGAGGGAAACAACCCAGACCGCCAGCTAAGGTCCCAAAGTCATGGTTAAGT  
GGGAAACGATGTGGGAAGGCCAGACAGCCAGGATGTTGGCTTAGAAGCAGCCATCATT  
AAAGAAAGCGTAATAGCTCACTGGTCGAGTCGGCCTGCGCGGAAGATGTAACGGGGCTAA  
ACCATGCACCGAAGCTGCGGCAGCGACGCTTATGCGTTGTTGGGTAGGGGAGCGTTCTGT  
AAGCCTGCGAAGGTGTGCTGTGAGGCATGCTGGAGGTATCAGAAGTGCGAATGCTGACAT  
AAGTAACGATAAAGCGGGTGAAAAGCCCGCTCGCCGGAAGACCAAGGGTTCCTGTCCAAC  
GTTAATCGGGGCAGGGTGAGTCGACCCCTAAGGCGAGGCCGAAAGGCGTAGTCGATGGG  
AAACAGGTTAATATTCCTGTACTTGGTGTACTGCGAAGGGGGGACGGAGAAGGCTATGTT  
GGCCGGGCGACGGTTGTCCCGGTTAAGCGTGTAGGCTGGTTTTCCAGGCAAATCCGGAA  
AATCAAGGCTGAGGCGTGATGACGAGGCACTACGGTGCTGAAGCAACAAATGCCCTGCTT  
CCAGGAAAAGCCTCTAAGCATCAGGTAACATCAAATCGTACCCCAAACCGACACAGGTGGT  
CAGGTAGAGAATAACCAAGGCGCTTGAGAGAACTCGGGTGAAGGAACTAGGCAAAATGGTG  
CCGTAACCTTCGGGAGAAGGCACGCTGATATGTAGGTGAGGTCCCTCGCGGATGGAGCTGA  
AATCAGTCGAAGATACCAGCTGGCTGCAACTGTTTATTAAAAACACAGCACTGTGCAACA  
CGAAAGTGGACGTATACGGTGTGACGCTGCCCGGTGCCGGAAGGTTAATTGATGGGGTT  
AGCGCAAGCGAAGCTCTTGATCGAAGCCCCGGTAAACGGCGGCCGTAACATAACGGTCC  
TAAGGTAGCGAAATTCCTTGTCGGGTAAGTTCCGACCTGCACGAATGGCCTAATGATGGC  
CAGGCTGTCTCCACCCGAGACTCAGTGAATTGAACTCGCTGTGAAGATGCAGTGTACCC  
GCGGCAAGACGGAAAGACCCCGTGAACCTTTACTATAGCTTGACACTGAACATTGAGCCTT  
GATGTGTAGGATAGGTGGGAGGCTTTGAAGTGTGGACGCCAGTCTGCATGGAGCCGACCT  
TGAAATACCACCTTTAATGTTTGATGTTCTAACGTTGACCCGTAATCCGGGTTGCGGACA  
GTGTCTGGTGGGTAGTTTACTGGGGCGGTCTCCTCCTAAAGAGTAACGGAGGAGCACGA

AGGTTGGCTAATCCTGGTCGGACATCAGGAGGTTAGTGCAATGGCATAAGCCAGCTTGAC  
TGCGAGCGTGACGGCGCGAGCAGGTGCGAAAGCAGGTCATAGTGATCCGGTGGTTCTGA  
ATGGAAGGGCCATCGCTCAACGGATAAAAGGTA CCGGGGATAACAGGCTGATACCGCC  
CAAGAGTTCATATCGACGGCGGTGTTTGGCACCTCGATGTCGGCTCATCACATCCTGGGG  
CTGAAGTAGGTCCCAAGGGTATGGCTGTTTCGCCATTTAAAGTGGTACGCGAGCTGGGTTT  
AGAACGTCGTGAGACAGTTCGGTCCCTATCTGCCGTGGGCGCTGGAGA ACTGAGGGGGG  
CTGCTCCTAGTACGAGAGGACCGGAGTGGACGCATCACTGGTGTTCGGGTTGTCATGCCA  
ATGGCACTGCCCGGTAGCTAAATGCGGAAGAGATAAGTGCTGAAAGCATCTAAGCACGAA  
ACTTGCCCCGAGATGAGTTCTCCCTGACCCTTTAAGGGTCTGAAGGAACGTTGAAGACG  
ACGACGTTGATAGGCCGGGTGTGTAAGCGCAGCGATGCGTTGAGCTAACCGGTA CTAATG  
AACCGTGAGGCTTAACCTTACAACGCCGAAGCTGTTTTGGCGGATGAGAGAAGATTTTCAG  
CCTGATACAGATTAATCAGAACGCAGAAGCGGTCTGATAAAACAGAATTTGCCTGGCGGC  
AGTAGCGCGGTGGTCCCACCTGACCCCATGCCGA ACTCAGAAGTGAACGCCGTAGCGC  
CGATGGTAGTGTGGGGTCTCCCATGCGAGAGTAGGGAACTGCCAGGCATCAAATAAAAC  
GAAAGGCTCAGTCGAAAGACTGGGCCTTTTCGTTTTATCTGTTGTTTGTTCGGTGAACGCTCT  
CCTGAGTAGGACAAATCCGCCGGGAGCGGATTTGAACGTTGCGAAGCAACGGCCCGGAG  
GGTGGCGGGCAGGACGCCCGCCATAAACTGCCAGGCATCAAATTAAGCAGAAGGCCATC  
CTGACGGATGGCCTTTTTGCGTTTCTACAAACTCTTCTGTCGTCATATCTACAAGCCGGC  
GCGCCGGGAAATGTGCGCGGAACCCCTATTTGTTATTTTTCTAAATACATTCAAATATGTA  
TCCGCTCATGAGACAATAACCCTGATAAATGCTTCAATAATATTGAAAAGGAAGAGTATGA  
GTATTCAACATTTCCGTGTCGCCCTTATTCCCTTTTTGCGGCATTTTGCCTTCTGTTTTG  
CTCACCCAGAAACGCTGGTGAAGTAAAAGATGCTGAAGATCAGTTGGGTGCACGAGTGG  
GTTACATCGAACTGGATCTCAACAGCGGTAAGATCCTTGAGAGTTTTCGCCCCGAAGAACG  
TTTTCCAATGATGAGCACTTTTAAAGTCTGCTATGTGGCGCGGTATTATCCCGTGTGACG  
CCGGGCAAGAGCAACTCGGTGCGCGCATACTATTCTCAGAATGACTTGGTTGAGTACTC  
ACCAGTCACAGAAAAGCATCTTACGGATGGCATGACAGTAAGAGAATTATGCAGTGCTGCA  
ATAACCATGAGTGATAACACTGCGGCCAACTTACTTCTGACAACGATCGGAGGACCGAAG  
GAGCTAACCGCTTTTTTGCACAACATGGGGGATCATGTA ACTCGCCTTGATCGTTGGGAAC  
CGGAGCTGAATGAAGCCATACCAAACGACGAGCGTGACACCACGATGCCTGCAGCAATGG  
CAACAACGTTGCGCAA ACTATTA ACTGGCGAACTACTTACTCTAGCTTCCCGGCAACAATTA  
ATAGACTGGATGGAGGCGGATAAAGTTGCAGGACCACTTCTGCGCTCGGCCCTTCCGGCT  
AGCTGGTTTATTGCTGATAAATCTGGAGCCGGTGAGCGTGGGTCTCGCGGTATCATTGCA  
GCACTGGGGCCAGATGGTAAGCCCTCCCGTATCGTAGTTATCTACACGACGGGGAGTCAG  
GCAACTATGGATGAACGAAATAGACAGATCGCTGAGATAGGTGCCTCACTGATTAAGCATT  
GGTA ACTGCAGACCAAGTTTACTCATATATACTTTAGATTGATTTAAA ACTTCATTTTTAATT  
AAAAGGATCTAGGTGAAGATCCTTTTTGATAATCTCATGACCAAATCCCTAACGTGAGTT  
TTCGTTCCACTGAGCGTCAGACCCCGTAGAAAAGATCAAAGGATCTTCTTGAGATCCTTTTT  
TTCTGCGCGTAATCTGCTGCTTGCAAACAAAAAAACCACCGCTACCAGCGGTGGTTTGT  
GCCGGATCAAGAGCTACCAACTCTTTTTCCGAAGGTA ACTGGCTT CAGCAGAGCGCAGATA  
CCAAACTGTCTTCTAGTGTAGCCGTAGTTAGGCCACCACTTCAAGAACTCTGTAGCAC  
CGCCTACATACCTCGCTCTGCTAATCCTGTTACCAGTGGCTGCTGCCAGTGGCGATAAGTC  
GTGTCTTACCGGGTTGGACTCAAGACGATAGTTACCGGATAAGGCGCAGCGGTTCGGGCTG  
AACGGGGGGTTTCGTGCACACAGCCCAGCTTGGAGCGAACGACCTACACCGAACTGAGATA  
CCTACAGCGTGAGCTATGAGAAAGCGCCACGCTTCCCGAAGGGAGAAAGGCGGACAGGT  
ATCCGGTAAGCGGCAGGGTCCGAACAGGAGAGCGCACGAGGGAGCTTCCAGGGGGAAA  
CGCCTGGTATCTTTATAGTCTGCTCGGGTTTCGCCACCTCTGACTTGAGCGTCGATTTTTG  
TGATGCTCGTCAGGGGGGCGGAGCCTATGAAAAACGCCAGCAACGCGGCCTTTTTACG  
GTTCTGGCCTTTTGTGGGCGGCCGC

pT7-rrnB-wild type:

TAATACGACTCACTATAGGGGCCGCTGAGAAAAAGCGAAGCGGCACTGCTCTTTAACAATT  
TATCAGACAATCTGTGTGGGCACTCGAAGATACGGATTCTTAACGTCGCAAGACGAAAAAT  
GAATACCAAGTCTCAAGAGTGAACACGTAATTCATTACGAAGTTTAATTCTTTGAGCGTCAA  
ACTTTTAAATTGAAGAGTTTGATCATGGCTCAGATTGAACGCTGGCGGCAGGCCTAACACA  
TGCAAGTCGAACGGTAACAGGAAGAAGCTTGCTTCTTTGCTGACGAGTGGCGGACGGGTG  
AGTAATGTCTGGGAAACTGCCTGATGGAGGGGGATAACTACTGGAAACGGTAGCTAATAC  
CGCATAACGTCGCAAGACCAAAGAGGGGGACCTTCGGGCCTCTTGCCATCGGATGTGCCC  
AGATGGGATTAGCTAGTAGGTGGGGTAACGGCTCACCTAGGCGACGATCCCTAGCTGGTC  
TGAGAGGATGACCAGCCACACTGGAACCTGAGACACGGTCCAGACTCCTACGGGAGGCAG  
CAGTGGGGAATATTGCACAATGGGCGCAAGCCTGATGCAGCCATGCCGCGTGTATGAAGA  
AGGCCCTTCGGGTTGTAAAGTACTTTCAGCGGGGAGGAAGGGAGTAAAGTTAATACCTTTGC  
TCATTGACGTTACCCGCAGAAGAAGCACCCGGCTAACTCCGTGCCAGCAGCCGCGGTAATA  
CGGAGGGTGAAGCGTTAATCGGAATTACTGGGCGTAAAGCGCACGCAGGCGGTTTGTTA  
AGTCAGATGTGAAATCCCCGGGCTCAACCTGGGAACTGCATCTGATACTGGCAAGCTTGA  
GTCTCGTAGAGGGGGGTAGAATTCCAGGTGTAGCGGTGAAATGCGTAGAGATCTGGAGGA  
ATACCGGTGGCGAAGGCGGCCCCCTGGACGAAGACTGACGCTCAGGTGCGAAAGCGTGG  
GGAGCAAACAGGATTAGATACCCTGGTAGTCCACGCCGTAAACGATGTCGACTTGGAGGT  
TGTGCCCTTGAGGCGTGGCTTCCGGAGCTAACGCGTTAAGTCGACCGCCTGGGGAGTAC  
GGCCGCAAGGTTAAACTCAAATGAATTGACGGGGGCCCGCACAAAGCGGTGGAGCATGT  
GGTTTAATTGATGCAACGCGAAGAACCTTACCTGGTCTTGACATCCACGGAAGTTTTAG  
AGATGAGAATGTGCCTTCGGGAACCGTGAGACAGGTGCTGCATGGCTGTCGTCAGCTCGT  
GTTGTGAAATGTTGGGTTAAGTCCCGCAACGAGCGCAACCCTTATCCTTTGTTGCCAGCGG  
TCCGGCCGGGAACTCAAAGGAGACTGCCAGTGATAAACTGGAGGAAGGTGGGGATGACG  
TCAAGTCATCATGGCCCTTACGACCAGGGCTACACACGTGCTACAATGGCGCATACAAAGA  
GAAGCGACCTCGCGAGAGCAAGCGGACCTCATAAAGTGCGTGCTAGTCCGGATTGGAGTC  
TGCAACTCGACTCCATGAAGTCGGAATCGCTAGTAATCGTGGATCAGAATGCCACGGTGAA  
TACGTTCCCGGGCCTTGTACACACCGCCCGTACACCATGGGAGTGGGTTGCAAAAGAAG  
TAGGTAGCTTAACCTTCGGGAGGGCGCTTACCACTTTGTGATTCATGACTGGGGTGAAGTC  
GTAACAAGGTAACCGTAGGGGAACCTGCGGTTGGATCACCTCCTTACCTTAAGAAGCGTA  
CTTTGTAGTGCTCACACAGATTGTCTGATAGAAAGTGAAAAGCAAGGCGTTTACGCGTTGG  
GAGTGAGGCTGAAGAGAATAAGGCCGTTTCGCTTTCTATTAATGAAAGCTCACCTACACGA  
AAATATCACGCAACGCGTGATAAGCAATTTTCGTGTCCCCTTCGTCTAGAGGCCCAGGACA  
CCGCCCTTTCACGGCGGTAACAGGGGTTTCAATCCCCTAGGGGACGCCACTTGCTGGTTT  
GTGAGTGAAAGTCGCCGACCTTAATATCTCAAACCTCATCTTCGGGTGATGTTTGAGATATT  
TGCTCTTTAAAAATCTGGATCAAGCTGAAAATTGAAACACTGAACAACGAGAGTTGTTTCGTG  
AGTCTCTCAAATTTTCGCAACACGATGATGAATCGAAAGAAACATCTTCGGGTTGTGAGGTT  
AAGCGACTAAGCGTACACGGTGGATGCCCTGGCAGTCAGAGGCGATGAAGGACGTGCTA  
ATCTGCGATAAGCGTTCGGTAAGGTGATATGAACCGTTATAACCGGCGATTTCCGAATGGG  
GAAACCCAGTGTGTTTCGACACACTATCATTAACTGAATCCATAGGTTAATGAGGCGAACC  
GGGGAACTGAAACATCTAAGTACCCCGAGGAAAAGAAATCAACCGAGATTCCCCAGTA  
GCGGCGAGCGAACGGGGAGCAGCCAGAGCCTGAATCAGTGTGTGTGTTAGTGGAAGCG  
TCTGGAAAGGCGCGCGATACAGGGTGACAGCCCCGTACACAAAATGCACATGCTGTGAG  
CTCGATGAGTAGGGCGGGACACGTGGTATCCTGTCTGAATATGGGGGGACCATCCTCCAA  
GGCTAAATACTCCTGACTGACCGATAGTGAACCAGTACCCTGAGGGAAAGGCGAAAAGAA  
CCCCGGCGAGGGGAGTGAAAAAGAACCTGAAACCGTGTACGTACAAGCAGTGGGAGCAC  
GCTTAGGCGTGTGACTGCGTACCTTTTGTATAATGGGTCAGCGACTTATATTCTGTAGCAA  
GGTTAACCGAATAGGGGAGCCGAAGGGAAACCGAGTCTTAACTGGGCGTTAAGTTGCAGG  
GTATAGACCCGAAACCCGGTGTATCTAGCCATGGGCAGGTTGAAGGTTGGGTAACACTAAC  
TGGAGGACCCGAAACCGACTAATGTTGAAAAATTAGCGGATGACTTGTGGCTGGGGGTGAAA  
GGCCAATCAAACCGGAGATAGCTGGTTCTCCCCGAAAGCTATTTAGGTAGCGCCTCGTG

AATTCATCTCCGGGGGTAGAGCACTGTTTCGGCAAGGGGGTTCATCCCGACTTACCAACCC  
GATGCAAACCTGCGAATACCGGAGAATGTTATCACGGGAGACACACGGCGGGTGCTAACGT  
CCGTCGTGAAGAGGGAAACAACCCAGACCGCCAGCTAAGGTCCCAAAGTCATGGTTAAGT  
GGGAAACGATGTGGGAAGGCCAGACAGCCAGGATGTTGGCTTAGAAGCAGCCATCATTT  
AAAGAAAGCGTAATAGCTCACTGGTCGAGTCGGCCTGCGCGGAAGATGTAACGGGGCTAA  
ACCATGCACCGAAGCTGCGGCAGCGACGCTTATGCGTTGTTGGGTAGGGGAGCGTTCTGT  
AAGCCTGCGAAGGTGTGCTGTGAGGCATGCTGGAGGTATCAGAAGTGCGAATGCTGACAT  
AAGTAACGATAAAGCGGGTGAAAAGCCCGCTCGCCGGAAGACCAAGGGTTCCTGTCCAAC  
GTTAATCGGGGCAGGGTGAGTCGACCCCTAAGGCGAGGCCGAAAGGCGTAGTCGATGGG  
AAACAGGTTAATATTCCTGTACTTGGTGTTACTGCGAAGGGGGGACGGAGAAGGCTATGTT  
GGCCGGGCGACGGTTGTCCCGGTTAAGCGTGTAGGCTGGTTTTCCAGGCAAATCCGGAA  
AATCAAGGCTGAGGCGTGATGACGAGGCACTACGGTGCTGAAGCAACAAATGCCCTGCTT  
CCAGGAAAAGCCTCTAAGCATCAGGTAACATCAAATCGTACCCCAAACCGACACAGGTGGT  
CAGGTAGAGAATACCAAGGCGCTTGAGAGAACTCGGGTGAAGGAACTAGGCAAATGGTG  
CCGTAACCTTCGGGAGAAGGCACGCTGATATGTAGGTGAGGTCCCTCGCGGATGGAGCTGA  
AATCAGTCGAAGATACCAGCTGGCTGCAACTGTTTATTA AAAACACAGCACTGTGCAAACA  
CGAAAGTGGACGTATACGGTGTGACGCTGCCCGGTGCCGGAAGGTTAATTGATGGGGTT  
AGCGCAAGCGAAGCTCTTGATCGAAGCCCGGTAACGGCGGCCGTA ACTATAACGGTCC  
TAAGGTAGCGAAATTCCTTGTCGGGTAAGTTCCGACCTGCACGAATGGCGTAATGATGGC  
CAGGCTGTCTCCACCCGAGACTCAGTGA AATTGAACTCGCTGTGAAGATGCAGTGTACCC  
GCGGCAAGACGGAAAGACCCCGTGAACCTTTACTATAGCTTGACACTGAACATTGAGCCTT  
GATGTGTAGGATAGGTGGGAGGCTTTGAAGTGTGGACGCCAGTCTGCATGGAGCCGACCT  
TGAAATACCACCTTTAATGTTTGATGTTCTAACGTTGACCCGTAATCCGGGTTGCGGACA  
GTGTCTGGTGGGTAGTTTGACTGGGGCGGTCTCCTCCTAAAGAGTAACGGAGGAGCACGA  
AGGTTGGCTAATCCTGGTTCGGACATCAGGAGGTTAGTGCAATGGCATAAGCCAGCTTGAC  
TGCGAGCGTGACGGCGCGAGCAGGTGCGAAAGCAGGTCATAGTGATCCGGTGGTTCTGA  
ATGGAAGGGCCATCGCTCAACGGATAAAAGGTA CTCCGGGGATAACAGGCTGATACCGCC  
CAAGAGTTCATATCGACGGCGGTGTTTGGCACCTCGATGTGCGGCTCATCACATCCTGGGG  
CTGAAGTAGGTCCCAAGGGTATGGCTGTTTCGCCATTTAAAGTGGTACGCGAGCTGGGTTT  
AGAACGTCGTGAGACAGTTCGGTCCCTATCTGCCGTGGGCGCTGGAGA ACTGAGGGGGG  
CTGCTCCTAGTACGAGAGGACCGGAGTGGACGCATCACTGGTGTTCGGGTTGT CATGCCA  
ATGGCACTGCCCGGTAGCTAAATGCGGAAGAGATAAGTGTGTAAGGCATCTAAGCACGAA  
ACTTGCCCCGAGATGAGTTCTCCCTGACCCTTTAAAGGTCCTGAAGGAACGTTGAAGACG  
ACGACGTTGATAGGCCGGGTGTGTAAGCGCAGCGATGCGTTGAGCTAACCGGTA CTAAATG  
AACCGTGAGGCTTAACCTTACAACGCCGAAGCTGTTTTGGCGGATGAGAGAAGATTTTCAG  
CCTGATACAGATTAATCAGAACGCAGAAGCGGTCTGATAAAACAGAATTTGCCTGGCGGC  
AGTAGCGCGGTGGTCCCACCTGACCCCATGCCGA ACTCAGAAGTGAAACGCCGTAGCGC  
CGATGGTAGTGTGGGGTCTCCCATGCGAGAGTAGGGAACTGCCAGGCATCAAATAAAAC  
GAAAGGCTCAGTCGAAAGACTGGGCCTTTTCGTTTTATCTGTTGTTTGTGCGGTGAACGCTCT  
CCTGAGTAGGACAAATCCGCCGGGAGCGGATTTGAACGTTGCGAAGCAACGGCCCGGAG  
GGTGGCGGGCAGGACGCCCGCATAAACTGCCAGGCATCAAATTAAGCAGAAGGCCATC  
CTGACGGATGGCCTTTTTGCGTTTCTACAAACTCTTCCTGTCGTCATATCTACAAGCCGGC  
GCGCAAATTGACAATTACTCATCCGGCTCGAATAATGTGTGGA ACTTAAACACACACAGG  
AGGAAAACATATGTCTATCCAGCACTTCCGTGTTGCGCTGATCCCGTTCTTCGCGGCGTTC  
TGCCTGCCGGTTTTTCGCGCACCCGGAACCCTGGTTAAAGTTAAAGACGCGGAAGACCAG  
CTGGGTGCGCGTGTGGTTACATCGAACTGGACCTGAACTCTGGTAAATCCTGGAATCTT  
TCCGTCCGGAAGAACGTTTCCCGATGATGTCTACCTTCAAAGTTCTGCTGTGCGGTGCGGT  
TCTGTCTCGTGTGACGCGGGTCAGGAACAGCTGGGTCGTCGTATCCACTACTCTCAGAA  
CGACCTGGTTGAATACTCTCCCGTTACCGAAAAACACCTGACCGACGGTATGACCGTTCTG  
GAACTGTGCTCTGCGGCGATCACCATGTCTGACAACACCGCAGCGAACCTGCTGCTGACC  
ACCATCGGTGGTCCGAAAGAACTGACCGGCTTCCTGCACAACATGGGCGACCACGTTACC

CGTCTGGACCGTTGGGAACCGGAACTGAACGAAGCGATCCCGAACGACGAACGTGACAC  
CACCATGCCTGCGGCGATGGCGACCACCCTGCGTAAACTGCTGACCGGTGAACTGCTGAC  
CCTGGCATCTCGTCAGCAGCTGATCGACTGGATGGAAGCGGACAAAGTTGCGGGTCCGCT  
GCTGCGTTCTGCGCTGCCTGCGGGTTGGTTCATCGCGGACAAATCTGGTGCGGGTGAAC  
GTGGTTCTCGTGGTATCATCGCGGCGCTGGGTCCGGACGGTAAACCGTCTCGTATCGTTG  
TTATCTACACCACCGTTTCTCAGGCGACCATGGACGAACGTAACCGTCAGATCGCGGAAA  
TCGGTGCGTCTCTGATTAACAACACTGGTAAACTCACTCCTAGCCCGCCTAATAAGCGGGCTT  
TTTTTCTGCAGACCAAGTTTACTCATATATACTTTAGATTGATTTAAAACCTTCATTTTTAATTT  
AAAAGGATCTAGGTGAAGATCCTTTTTGATAATCTCATGACCAAATCCCTAACGTGAGTT  
TTCGTTCCACTGAGCGTCAGACCCCGTAGAAAAGATCAAAGGATCTTCTTGAGATCCTTTTT  
TTCTGCGCGTAATCTGCTGCTTGCAAACAAAAAACCCGCTACCAGCGGTGGTTTGT  
GCCGGATCAAGAGCTACCAACTCTTTTTCCGAAGGTAACCTGGCTTCAGCAGAGCGCAGATA  
CAAATACTGTCCTTCTAGTGTAGCCGTAGTTAGGCCACCACTTCAAGAACTCTGTAGCAC  
CGCCTACATACCTCGCTCTGCTAATCCTGTTACCAGTGGCTGCTGCCAGTGGCGATAAGTC  
GTGTCTTACCGGGTTGGACTCAAGACGATAGTTACCGGATAAGGCGCAGCGGTGCGGGCTG  
AACGGGGGGTTCGTGCACACAGCCCAGCTTGGAGCGAACGACCTACACCGAACTGAGATA  
CCTACAGCGTGAGCTATGAGAAAGCGCCACGCTTCCCGAAGGGAGAAAGGCGGACAGGT  
ATCCGGTAAGCGGCAGGGTCGGAACAGGAGAGCGCACGAGGGAGCTTCCAGGGGGAAA  
CGCCTGGTATCTTTATAGTCCTGTGCGGGTTTCGCCACCTCTGACTTGAGCGTCGATTTTTG  
TGATGCTCGTCAGGGGGGCGGAGCCTATGGAAAAACGCCAGCAACGCGGCCTTTTTACG  
GTTCTGGCCTTTTGCTGGT

### 3. Supplemental Figures

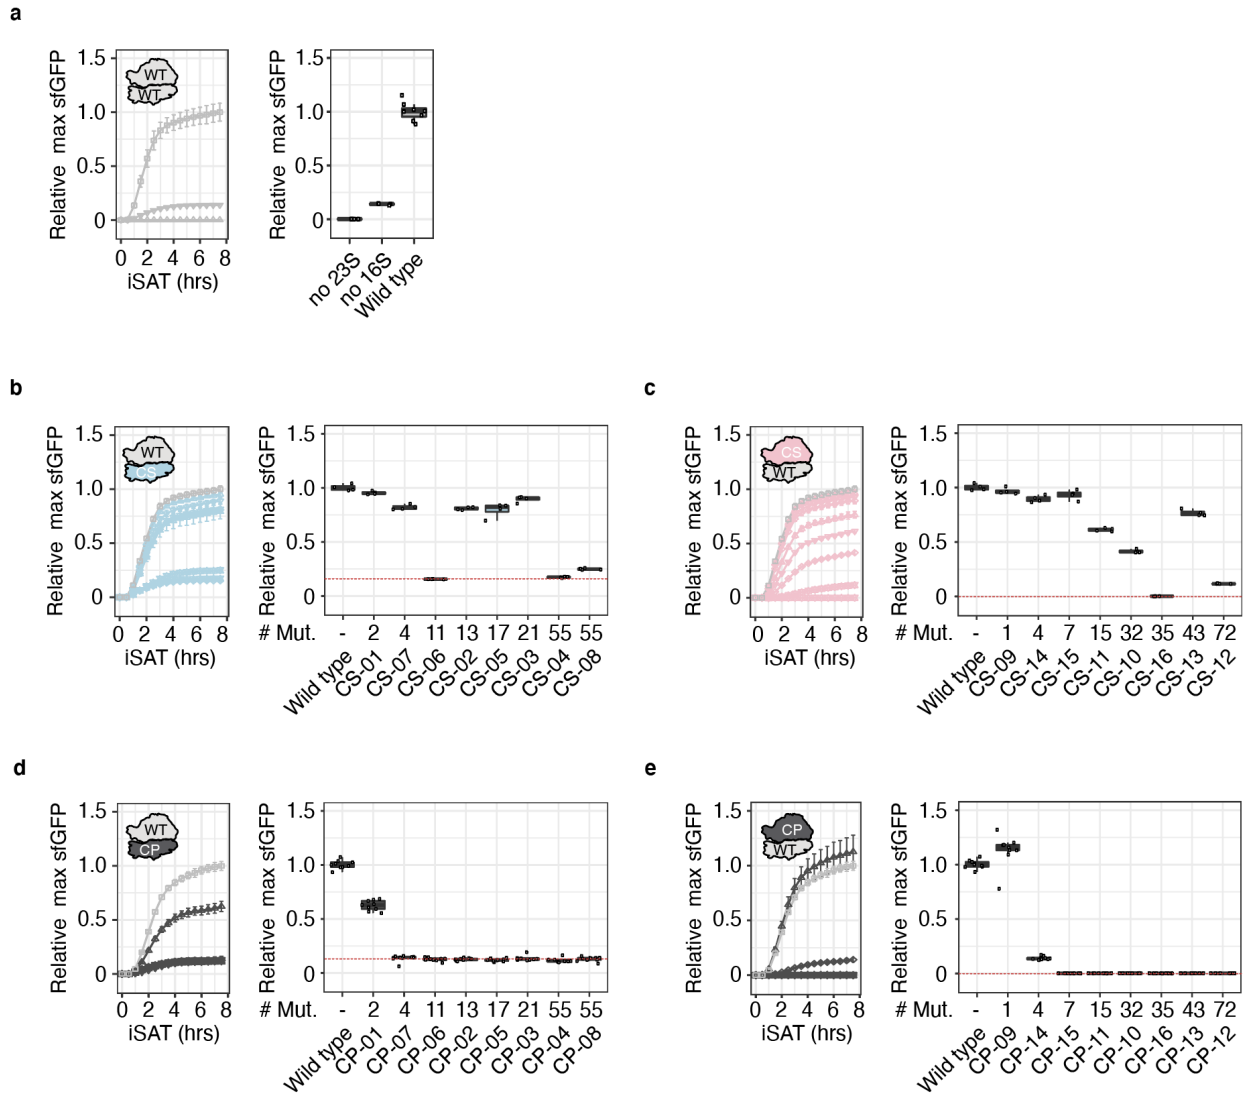

**Supplementary Figure 1: sfGFP expression of 16S and 23S rRNA designs during iSAT.** (a). Community scientist-designed (CS) 16S rRNA (b) and 23S rRNA (c) designs. Computationally predicted (CP) 16S rRNA (d) and 23S rRNA (e). sfGFP expression in iSAT was determined by fluorescence over the course of 8 hours and normalized to the maximum sfGFP made by the wild type ribosome. Time course data are shown as mean  $\pm$  s.d. on the left of each panel and the relative max sfGFP generated by each design as boxplots on its right side. Error bars represent s.d.;  $n \geq 4$ . Dotted red line indicates background activity arising from the extract. Mut: mutations; WT: wild type.



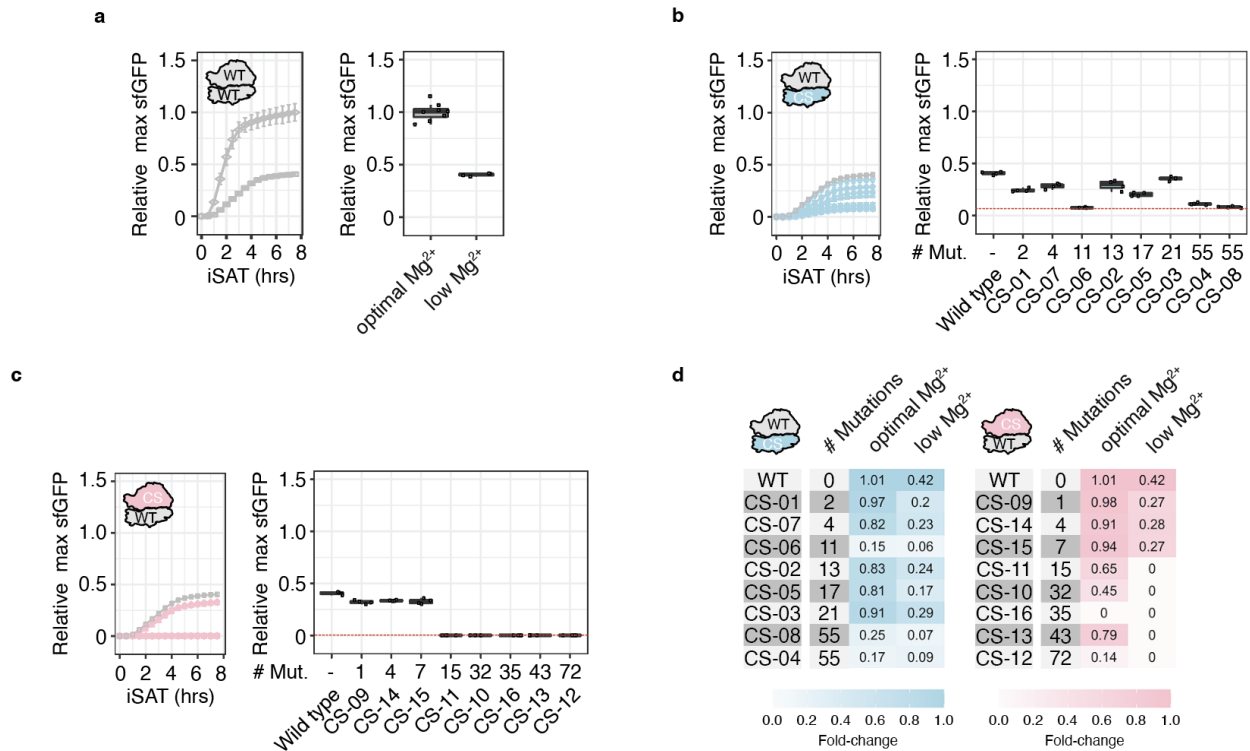

**Supplementary Figure 2: Eterna rRNAs can enable cell-free translation in folding stress conditions.** (a) Relative sfGFP expression of wild type ribosomes under optimal and low (3.75 mM)-magnesium ( $Mg^{2+}$ ) iSAT conditions. Performance of Eterna 16S rRNAs (b) and 23S rRNAs (c) at high magnesium iSAT conditions. (d) Heatmap illustrating number of rRNA mutations and relative maximum sfGFP expression in optimal (7.5 mM) and low (3.75 mM)-magnesium iSAT reactions of pT7-rrnB-16S (left) and pT7-rrnB-23S (right) wild type and variants designed by community scientists (CS). sfGFP expression was determined by fluorescence over 8 hours and normalized to the maximum sfGFP of pT7-rrnB-WT at optimal iSAT conditions. Max sfGFP made by each design is shown as means normalized to pT7-rrnB-wild type activity at optimal iSAT conditions. Error bars represent s.d.;  $n \geq 4$ . Dotted red line indicates background activity arising from the extract. Mut: mutations; WT: wild type.

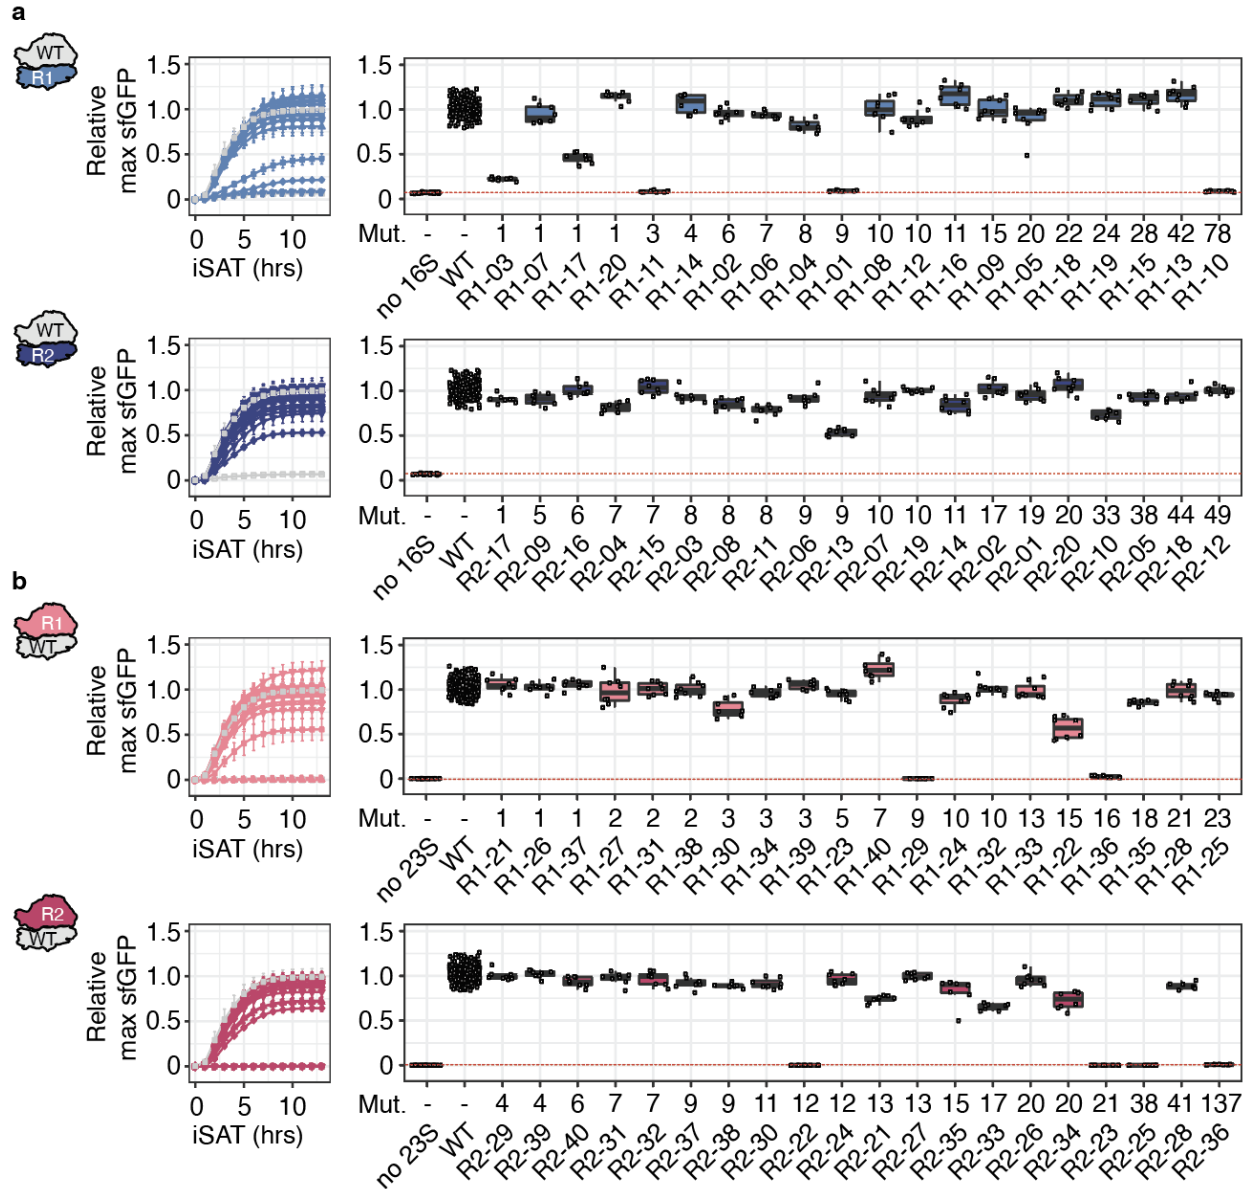

**Supplementary Figure 3: iSAT time courses of Round (R1) and Round 2 (R2) Eterna designed ribosomes.** sfGFP expression of pT7-rrnB-R1 and pT7-rrnB-R2 16S rRNA (a) and pT7-rrnB-R1 and pT7-rrnB-R2 23S rRNA (b) designs for 16-hour iSAT reactions. sfGFP expression in iSAT was determined by fluorescence and normalized to max sfGFP of pT7-rrnB-wild type. Error bars represent s.d.;  $n \geq 3$ . Dotted red line indicates background activity arising from the extract. Mut: mutations, R1: round 1, R2: round 2, WT: wild type.

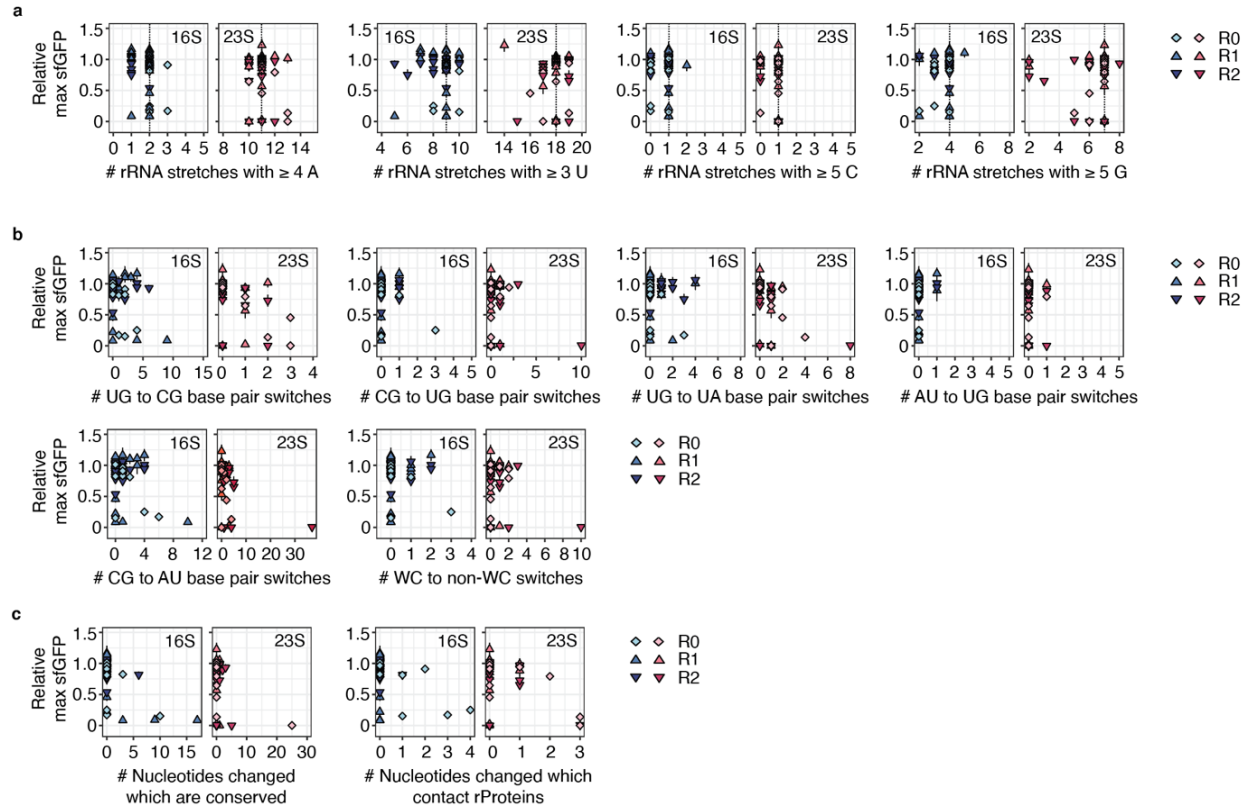

**Supplementary Figure 4: Community scientists followed and combined different strategies to improve rRNA performance.** Relative maximum sfGFP expression made in iSAT reactions by each design was plotted against the instances of (a) stretches of consecutive identical nucleotides, (b) altered base pairing in rRNA secondary structures, or (c) changes in conserved nucleotides or nucleotides which contact rProteins. Data are shown from the “pilot round” (R0) and round 1 (R1) and round 2 (R2) as mean  $\pm$  s.d.;  $n \geq 3$ . Dotted line in (a) indicates wild type value. rProteins: ribosomal proteins; WC: Watson-Crick.

WT  
R1  
# Mutations  
Low Mg<sup>2+</sup>/37°C  
Low Mg<sup>2+</sup>/30°C

|       | # Mutations | Low Mg <sup>2+</sup> /37°C | Low Mg <sup>2+</sup> /30°C |
|-------|-------------|----------------------------|----------------------------|
| WT    | 0           | 0.41                       | 0.33                       |
| R1-02 | 6           | 0.39                       | 0.3                        |
| R1-06 | 7           | 0.43                       | 0.32                       |
| R1-04 | 8           | 0.26                       | 0.19                       |
| R1-12 | 10          | 0.36                       | 0.27                       |
| R1-08 | 10          | 0.44                       | 0.31                       |
| R1-16 | 11          | 0.41                       | 0.33                       |
| R1-09 | 15          | 0.41                       | 0.3                        |
| R1-05 | 20          | 0.38                       | 0.3                        |
| R1-18 | 22          | 0.34                       | 0.32                       |
| R1-19 | 24          | 0.26                       | 0.28                       |
| R1-15 | 28          | 0.41                       | 0.31                       |
| R1-13 | 42          | 0.42                       | 0.35                       |

WT  
R2  
# Mutations  
Low Mg<sup>2+</sup>/37°C  
Low Mg<sup>2+</sup>/30°C

|       | # Mutations | Low Mg <sup>2+</sup> /37°C | Low Mg <sup>2+</sup> /30°C |
|-------|-------------|----------------------------|----------------------------|
| WT    | 0           | 0.41                       | 0.33                       |
| R2-16 | 6           | 0.42                       | 0.37                       |
| R2-15 | 7           | 0.47                       | 0.37                       |
| R2-03 | 8           | 0.4                        | 0.11                       |
| R2-06 | 9           | 0.41                       | 0.11                       |
| R2-07 | 10          | 0.36                       | 0.09                       |
| R2-19 | 10          | 0.42                       | 0.35                       |
| R2-02 | 17          | 0.41                       | 0.32                       |
| R2-01 | 19          | 0.44                       | 0.11                       |
| R2-20 | 20          | 0.38                       | 0.35                       |
| R2-05 | 38          | 0.37                       | 0.13                       |
| R2-18 | 44          | 0.4                        | 0.26                       |
| R2-12 | 49          | 0.39                       | 0.37                       |

R1  
WT  
# Mutations  
Low Mg<sup>2+</sup>/37°C  
Low Mg<sup>2+</sup>/30°C

|       | # Mutations | Low Mg <sup>2+</sup> /37°C | Low Mg <sup>2+</sup> /30°C |
|-------|-------------|----------------------------|----------------------------|
| WT    | 0           | 0.41                       | 0.33                       |
| R1-40 | 7           | 0.37                       | 0.31                       |
| R1-32 | 10          | 0.02                       | 0.03                       |
| R1-24 | 10          | 0                          | 0                          |
| R1-33 | 13          | 0.21                       | 0.19                       |
| R1-35 | 18          | 0.07                       | 0.03                       |
| R1-28 | 21          | 0.02                       | 0.02                       |
| R1-25 | 23          | 0.16                       | 0.18                       |

R2  
WT  
# Mutations  
Low Mg<sup>2+</sup>/37°C  
Low Mg<sup>2+</sup>/30°C

|       | # Mutations | Low Mg <sup>2+</sup> /37°C | Low Mg <sup>2+</sup> /30°C |
|-------|-------------|----------------------------|----------------------------|
| WT    | 0           | 0.41                       | 0.33                       |
| R2-40 | 6           | 0.15                       | 0.12                       |
| R2-32 | 7           | 0.22                       | 0.32                       |
| R2-31 | 7           | 0.05                       | 0.36                       |
| R2-37 | 9           | 0.09                       | 0.22                       |
| R2-38 | 9           | 0.3                        | 0.17                       |
| R2-30 | 11          | 0.22                       | 0.17                       |
| R2-24 | 12          | 0.32                       | 0.28                       |
| R2-27 | 13          | 0.32                       | 0.18                       |
| R2-26 | 20          | 0.28                       | 0.38                       |
| R2-28 | 41          | 0.43                       | 0.1                        |

**Supplementary Figure 5: Eterna designs are robust across diverse folding stress conditions *in vitro*.** Data are replotted from Main Figure 4a, but with numerical values listed. sfGFP expression in iSAT was determined by fluorescence and normalized to max sfGFP of pT7-rrnB-wild type at optimal iSAT conditions. Data are shown as mean; n ≥ 3. R1: round 1, R2: round 2, WT: wild type.

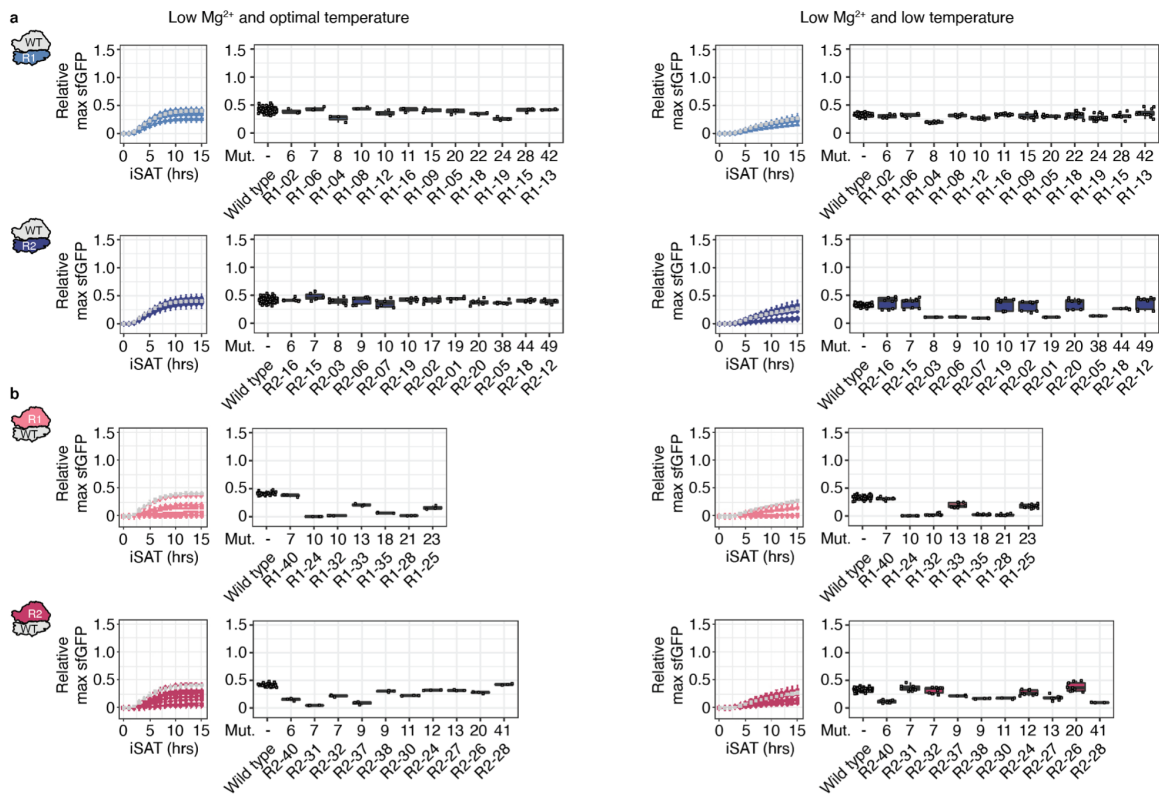

**Supplementary Figure 6: iSAT kinetics and maximum yields for Eterna designed ribosomes under folding stress.** sfGFP expression of (a) pT7-rrnB-16S R1 and R2 designs and (b) pT7-rrnB-23S R1 and R2 designs in iSAT at low  $Mg^{2+}$  concentration (3.75 mM) and optimal temperature (37° C) (left panels) and low  $Mg^{2+}$  concentration (3.75 mM) and low temperature (30° C) (right panels). sfGFP expression was determined in 15 hour iSAT reactions by fluorescence and normalized to max sfGFP of pT7-rrnB-wild type at optimal iSAT conditions. Data are shown as mean. Error bars represent s.d.;  $n \geq 3$ . These data were used to generate the heat maps in Main Figure 3 and Suppl. Figure 5. Mut: mutations; R1: round 1, R2: round 2, WT: wild type.

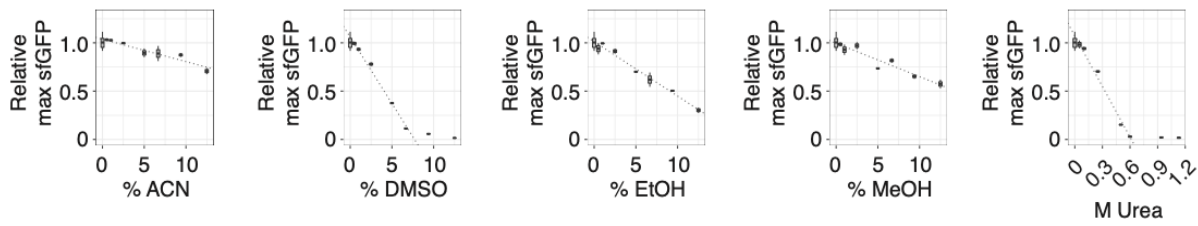

**Supplementary Figure 7: Influence of solvents on iSAT reactions.** sfGFP expression of pT7-rnB-WT in iSAT in the presence of increasing concentrations of solvents. Solvents are shown based on volume percent. ACN: acetonitrile, DMSO: dimethylsulfoxide, EtOH: ethanol, MeOH: methanol. Data are shown as boxplots. Error bars represent s.d.;  $n \geq 3$ .

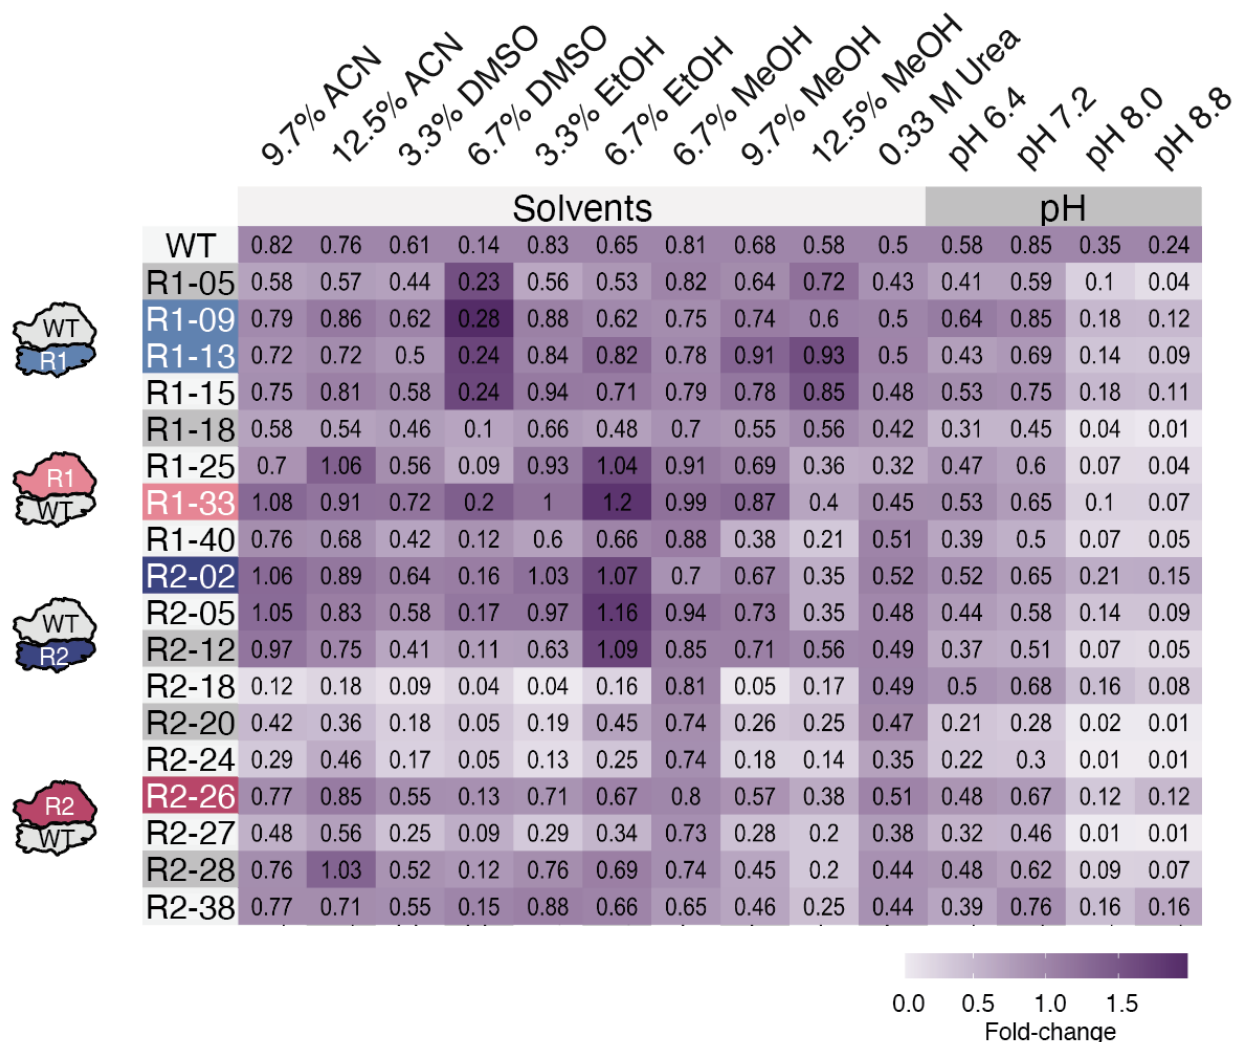

**Supplementary Figure 8: Eterna designs are robust across diverse *in vitro* stress conditions.** Data are replotted from Main Figure 4b, but with numerical values listed. sfGFP expression in iSAT was determined by fluorescence and normalized to the maximum sfGFP of pT7- rrnB-WT at optimal iSAT conditions. Data are shown as mean;  $n \geq 3$ . ACN: acetonitrile, DMSO: dimethylsulfoxide, EtOH: ethanol, MeOH: methanol, HEPES: (4-(2-hydroxyethyl)-1-piperazineethanesulfonic acid), MES: 2-(N-morpholino)ethanesulfonic acid, Tris: tris(hydroxymethyl)aminomethane, Mut: mutations, R1: round 1, R2: round 2, WT: wild type. 16S rRNA and 23S rRNA designs whose names have been highlighted represent the most diverse and robust 16S rRNA and 23S rRNA designs per round.

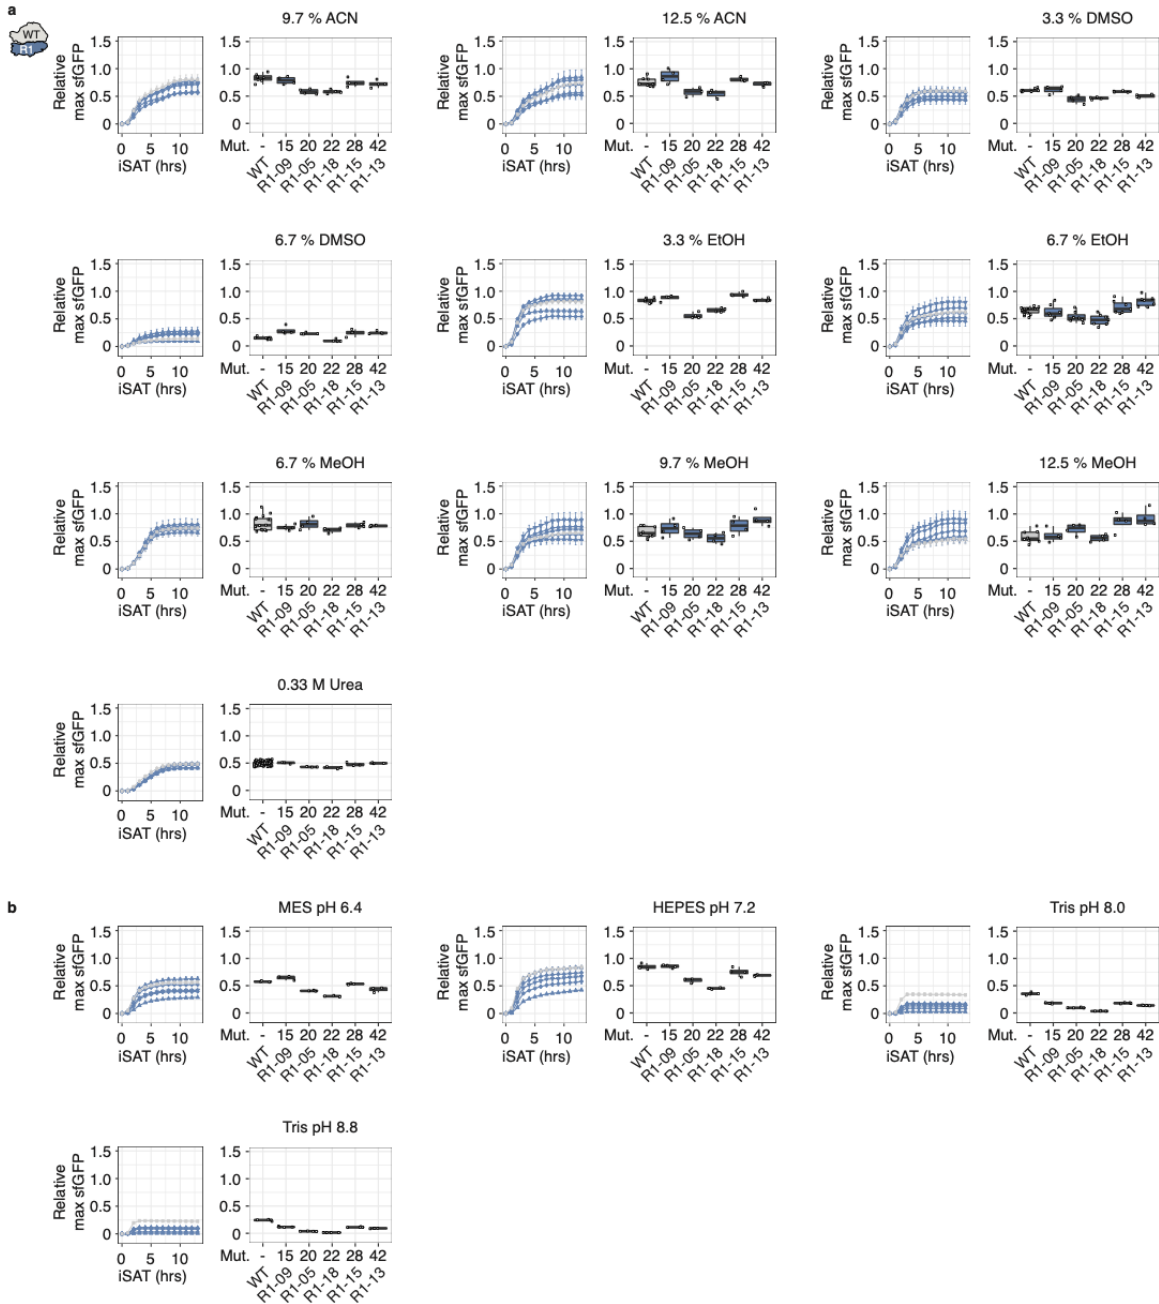

**Supplementary Figure 9: Influence of solvents and pH on iSAT reactions of selected R1 16S rRNA designs. (a) Solvents (v/v %). (b) pH.** Time course data are shown as mean  $\pm$  s.d. Maximum sfGFP expression was determined in iSAT reactions by fluorescence and normalized to max sfGFP of pT7-rrnB-wild type at optimal iSAT conditions. Maximal sfGFP expression data are presented as boxplots. Error bars represent s.d.;  $n \geq 3$ . ACN: acetonitrile, DMSO: dimethylsulfoxide, EtOH: ethanol, MeOH: methanol, HEPES: (4-(2-hydroxyethyl)-1-piperazineethanesulfonic acid), MES: 2-(N-morpholino)ethanesulfonic acid, Tris: tris(hydroxymethyl)aminomethane, Mut: mutations, R1: round 1, WT: wild type.



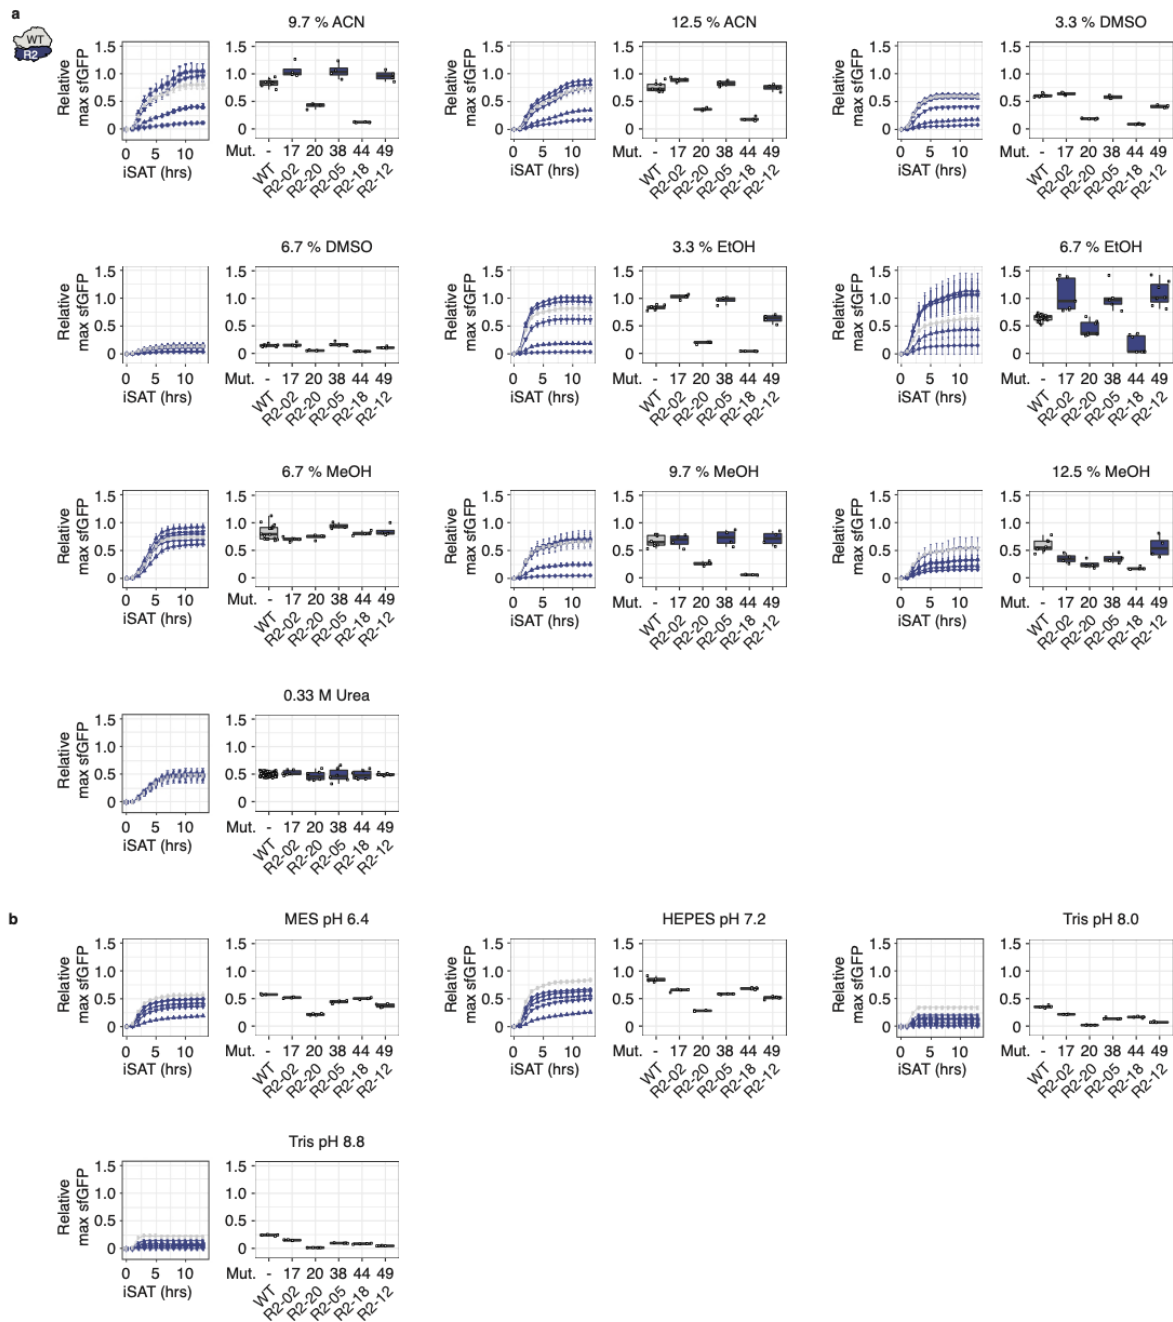

**Supplementary Figure 10: Influence of solvents and pH on iSAT reactions of selected R2 16S rRNA designs. (a) Solvents (v/v %). (b) pH.** Time course data are shown as mean  $\pm$  s.d. Maximum sfGFP expression was determined in iSAT reactions by fluorescence and normalized to max sfGFP of pT7-rrnB-wild type at optimal iSAT conditions. Maximal sfGFP expression data are presented as boxplots. Error bars represent s.d.;  $n \geq 3$ . ACN: acetonitrile, DMSO: dimethylsulfoxide, EtOH: ethanol, MeOH: methanol, HEPES: (4-(2-hydroxyethyl)-1-piperazineethanesulfonic acid), MES: 2-(N-morpholino)ethanesulfonic acid, Tris: tris(hydroxymethyl)aminomethane, Mut: mutations, R2: round 1, WT: wild type

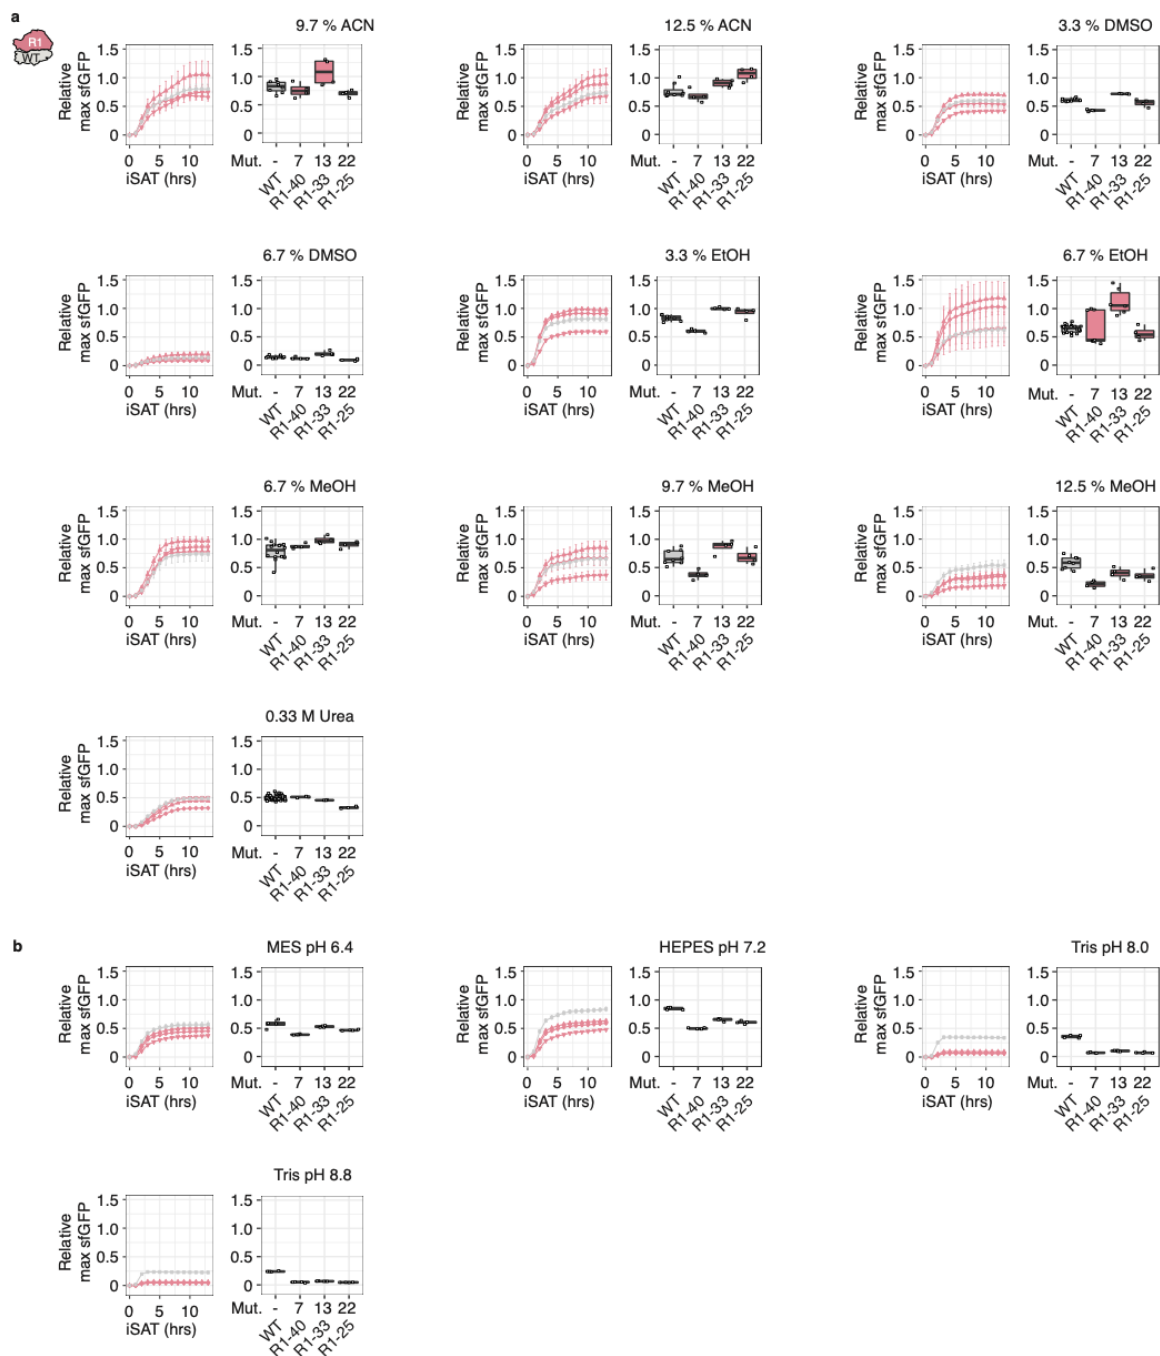

**Supplementary Figure 11: Influence of solvents and pH on iSAT reactions of selected R1 23S rRNA designs. (a) Solvents (v/v %). (b) pH.** Time course data are shown as mean  $\pm$  s.d. Maximum sfGFP expression was determined in iSAT reactions by fluorescence and normalized to max sfGFP of pT7-rrnB-wild type at optimal iSAT conditions. Maximal sfGFP expression data are presented as boxplots. Error bars represent s.d.;  $n \geq 3$ . ACN: acetonitrile, DMSO: dimethylsulfoxide, EtOH: ethanol, MeOH: methanol, HEPES: (4-(2-hydroxyethyl)-1-piperazineethanesulfonic acid), MES: 2-(N-morpholino)ethanesulfonic acid, Tris: tris(hydroxymethyl)aminomethane, Mut: mutations, R1: round 1, WT: wild type.

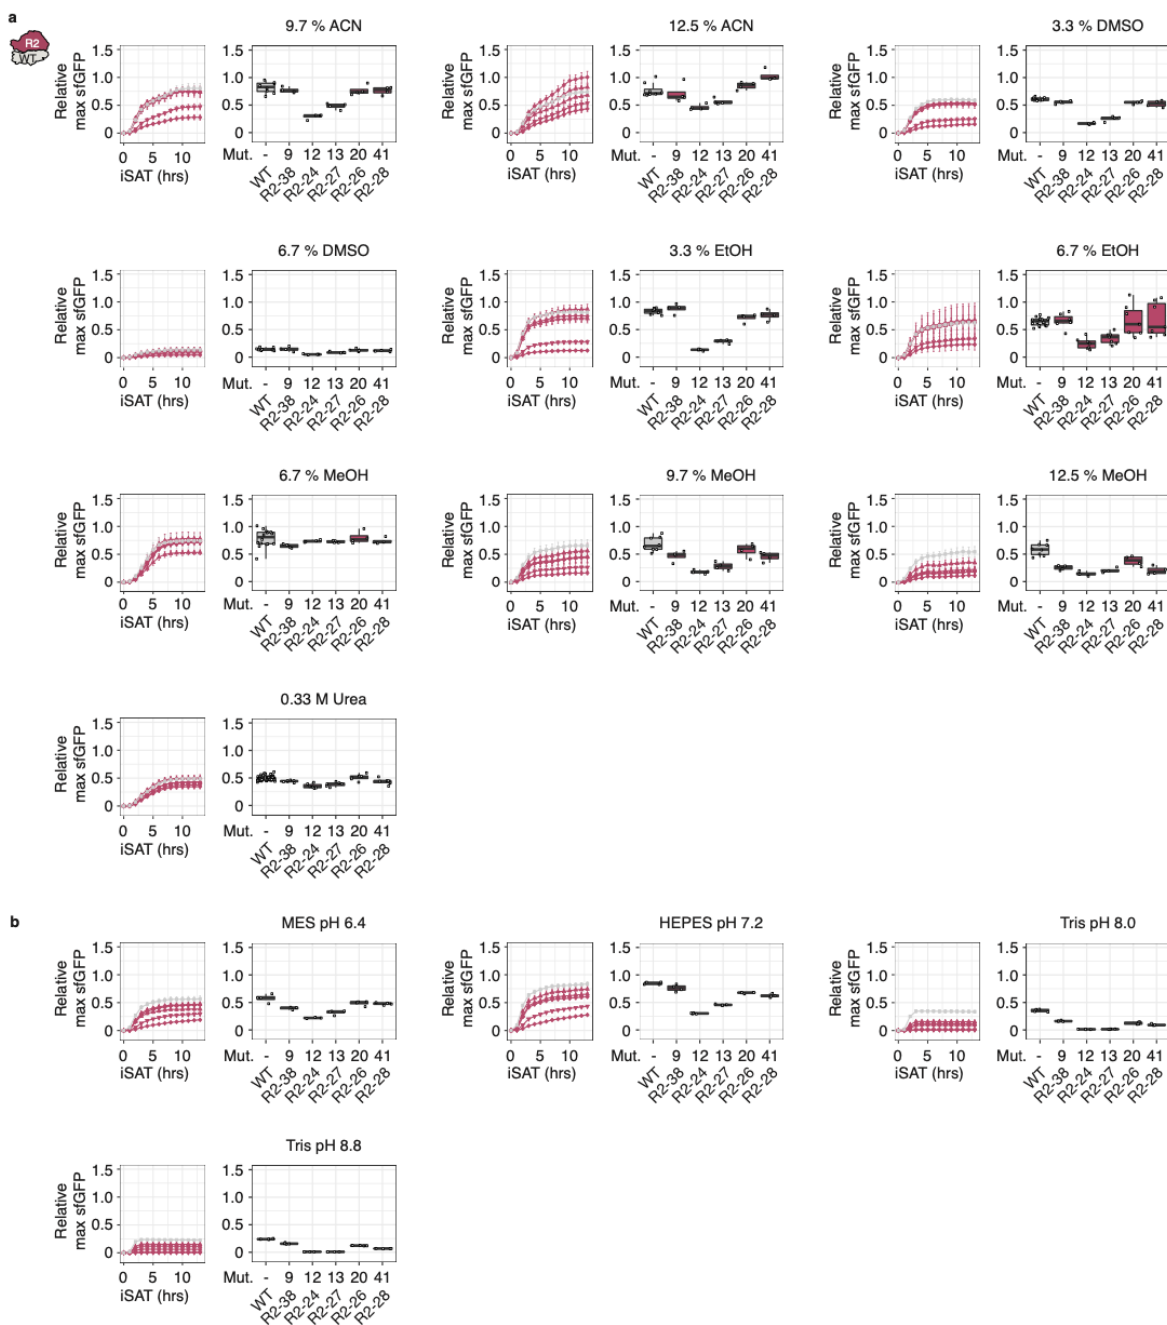

**Supplementary Figure 12: Influence of solvents and pH on iSAT reactions of selected R2 23S designs.** (a) Solvents (v/v %). (b) pH. Time course data are shown as mean  $\pm$  sd. Maximum sfGFP expression was determined in iSAT reactions by fluorescence and normalized to max sfGFP of pT7-rrnB-wild type at optimal iSAT conditions. Maximal sfGFP expression data are presented as boxplots. Error bars represent s.d.;  $n \geq 3$ . ACN: acetonitrile, DMSO: dimethylsulfoxide, EtOH: ethanol, MeOH: methanol, HEPES: (4-(2-hydroxyethyl)-1-piperazineethanesulfonic acid), MES: 2-(N-morpholino)ethanesulfonic acid, Tris: tris(hydroxymethyl)aminomethane, Mut: mutations, R2: round 2, WT: wild type.

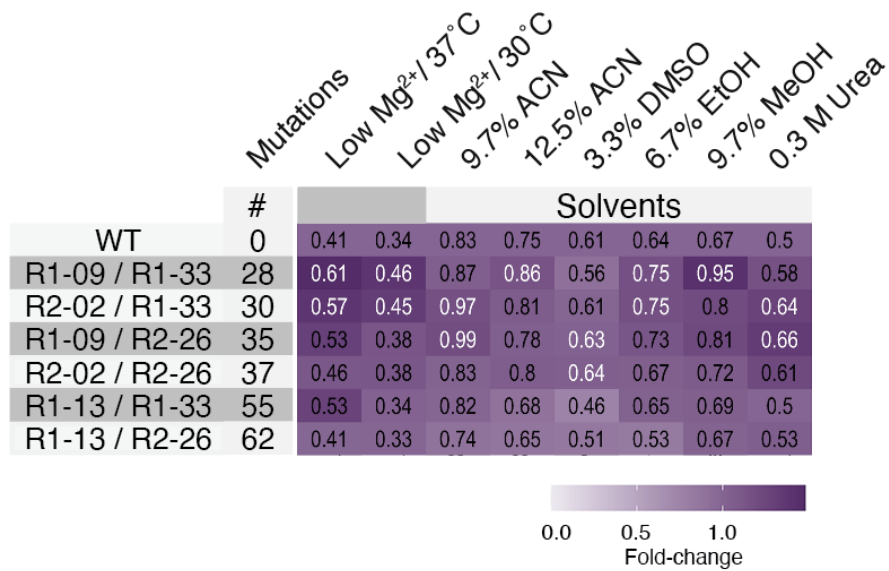

**Supplementary Figure 13: Eterna designs are robust across diverse *in vitro* stress conditions** (i.e., solvents). Data are replotted from Main Figure 5a, but with numerical values listed. sfGFP expression in iSAT was determined by fluorescence and normalized to maximum sfGFP of pT7- rrnB-wild type at optimal iSAT conditions. Data are shown as mean;  $n \geq 3$ . ACN: acetonitrile, DMSO: dimethylsulfoxide, EtOH: ethanol, MeOH: methanol, WT: wild type.

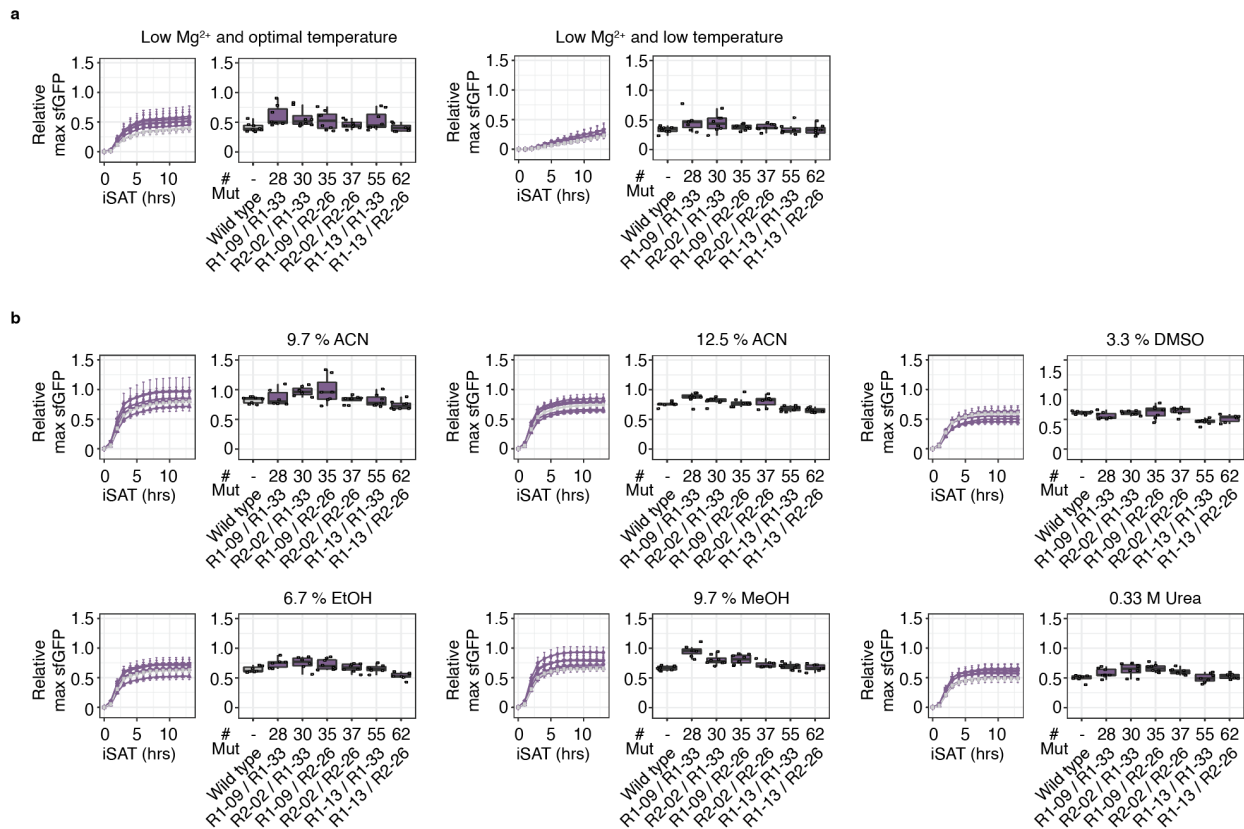

**Supplementary Figure 14: Influence of *in vitro* solvent conditions on iSAT reactions of Eterna ribosomes.** (a) Relative sfGFP expression of ribosomes with both 16S rRNA and 23S rRNA designs under iSAT conditions at low (3.75 mM)-magnesium (Mg<sup>2+</sup>) and optimal or low (3.75 mM)-magnesium (Mg<sup>2+</sup>) and low temperature. (b) Solvents (v/v %). Time course data are shown as mean ± s.d. Maximum sfGFP expression was determined in iSAT reactions by fluorescence and normalized to max sfGFP of pT7-rrnB-wild type at optimal iSAT conditions. Maximal sfGFP expression data are presented as boxplots. Error bars represent s.d.; n ≥ 3. ACN: acetonitrile, DMSO: dimethylsulfoxide, EtOH: ethanol, MeOH: methanol, Mut: mutations.

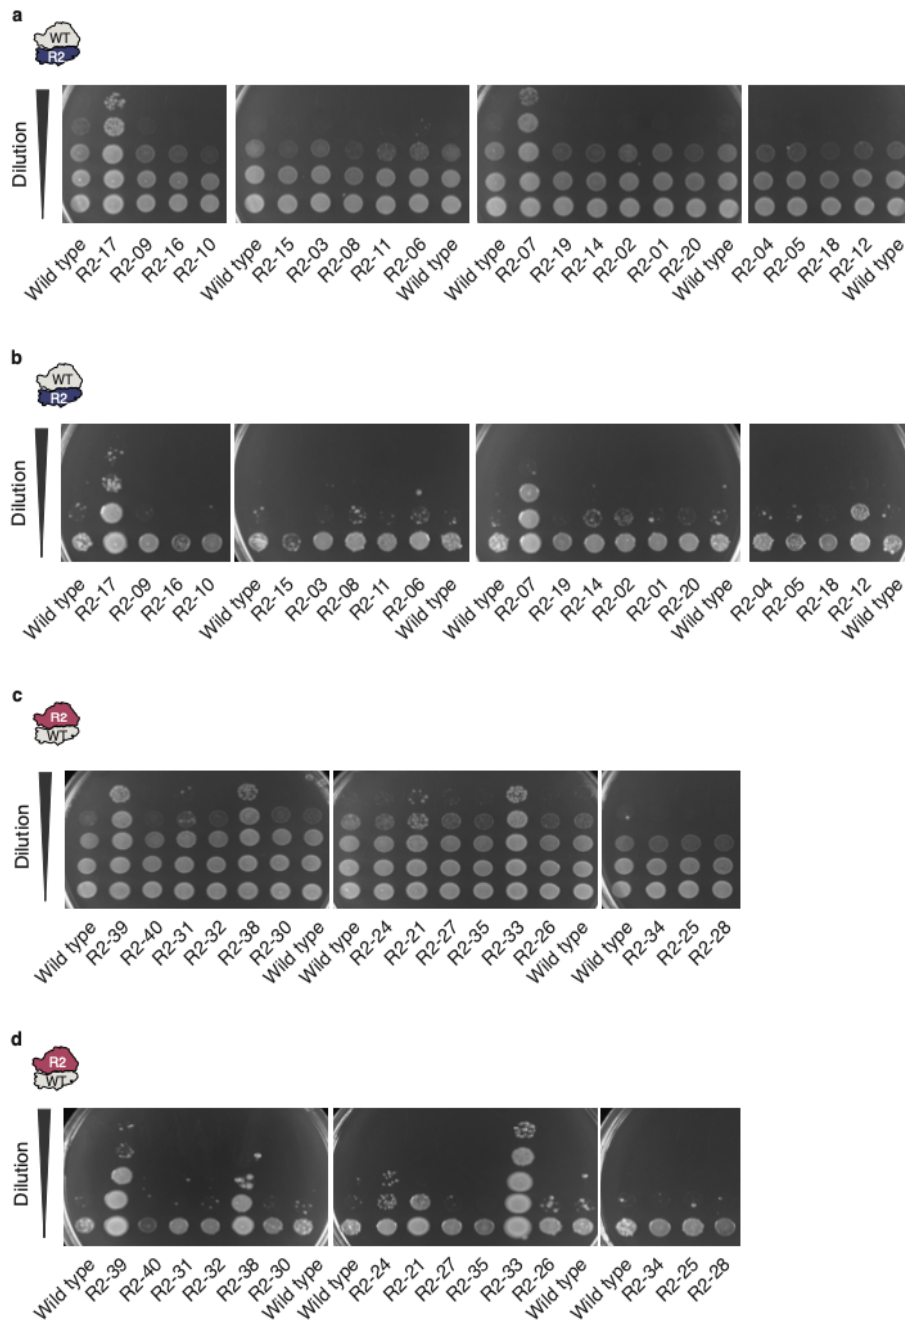

**Supplementary Figure 15: R2 Eterna designs support life.** (a-d) Un-cut images of spotted SQ171fg cells growing with pL-rrnB-wild type and pL-rrnB-R2 16S rRNA (a, b) and 23S rRNA (c, d) designs imaged after 24 hours at 37 °C (a, c) or 72 hours at 30 °C (b, d). Stationary cells were diluted to an OD600 = 1, diluted stepwise 1:10, and spotted onto LB + Carb100 plates. Data are representative of  $n \geq 3$ . R2: round 2, WT: wild type.

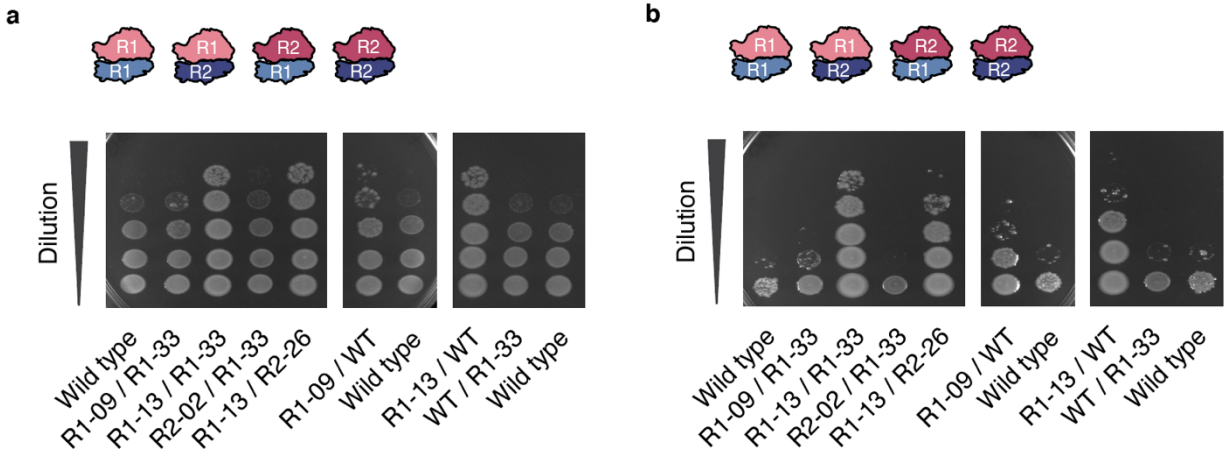

**Supplementary Figure 16: Combinatorial Eterna designs support life.** (a-b) Un-cut images of spotted SQ171fg cells growing with pL-rnB-wild type and pL-rnB-Combinations imaged after 24 hours at 37 °C (a) or 72 hours at 30 °C (b). Stationary cells were diluted to an OD600 = 1, diluted stepwise 1:10, and spotted onto LB + Carb100 plates. Data are representative of  $n \geq 3$ . R1: round 1, R2: round 2, WT: wild type.
